# Supplementary material
Source: publisher figshare collection journal article supplement (https://sage.figshare.com/ndownloader/files/14530340)
Supplement: Supplementary file 1 [file 14530340]

Appendix A. International Index of Erectile Function Version 5 Questionnaire (English version).

International index of Erectile Function Questionnaire

All questions are preceded by the phrase “Over the past 4 weeks”

1. How do you rate your confidence that you could get and keep an erection?

1. ☐ Very low

2. ☐ Low

3. ☐ Moderate

4. ☐ High

5. ☐ Very high

2. When you attempted sexual intercourse, how often were you able to penetrate (enter) your partner?

0. ☐ Did not attempt intercourse

1. ☐ Almost never / never

2. ☐ A few times (much less than half of the times)

3. ☐ Sometimes (about half of the times)

4. ☐ Most of the times (much more than half of the times)

5. ☐ Almost always / Always

3. During sexual intercourse, how often were you able to maintain your erection after you had penetrated (entered) your partner?

0. ☐ Did not attempt intercourse

1. ☐ Almost never / never

2. ☐ A few times (much less than half of the times)

3. ☐ Sometimes (about half of the times)

4. ☐ Most of the times (much more than half of the times)

5. ☐ Almost always / Always

4. During sexual intercourse, how difficult was it to maintain your erection to completion of intercourse?

0. ☐ Did not attempt intercourse

1. ☐ Extremely difficult

2. ☐ Very difficult

3. ☐ Difficult

4. ☐ Slightly difficult

5. ☐ Not difficult

5. How much have you enjoyed sexual intercourse?

0. ☐ No intercourse

1. ☐ No enjoyment

2. ☐ Not very enjoyable

3. ☐ Fairly enjoyable

4. ☐ Highly enjoyable

5. ☐ Very highly enjoyable

**Marks:** _________________

**Please sum up all the marks obtained in the above five questions.**

**21 or below means you may have erectile dysfunction and are suggested to ask your doctor for further investigation.**

Appendix B. International Index of Erectile Function Version 5 Questionnaire (validated Chinese version).

國際標準及勃起功能－5（IIEF-5）

問卷評定

以下 1-5 題之總和可助你評估人的勃起功能：

1. 最近四星期內，你對陰莖可以及維持勃起有幾大***信心***？

1. ☐ 很小

2. ☐ 小

3. ☐ 中等

4. ☐ 大

5. ☐ 很大

2. 最近四星期內，當陰莖勃起後，你經常有足夠硬度可***插入***伴侶體內嗎？

0. ☐ 沒有性刺激或勃起

1. ☐ 幾乎不可以，或沒有

2. ☐ 間中可以（遠少於一半時候）

3. ☐ 有時可以（約一半時候）

4. ☐ 多數可以（遠多於一半時候）

5. ☐ 幾乎必定可以，或必定可以

3. 最近四星期內，在你性交*時，當陰莖插入伴侶體內後，陰莖經常可以***維持***勃起嗎？

0. ☐ 沒有性交

1. ☐ 幾乎不可以，或不可以

2. ☐ 間中可以，（遠少於一半時候）

3. ☐ 有時可以（約一半時候）

4. ☐ 多數可以（遠多於一半時候）

5. ☐ 幾乎必定可以，或必定可以

4. 最近四星期內，在你性交*時，要維持陰莖勃起直到性交完畢有***幾困難***？

0. ☐ 沒有性交

1. ☐ 極困難

2. ☐ 十分困難

3. ☐ 困難

4. ☐ 有點困難

5. ☐ 不困難

5. 最近四星期內，你經常有***滿意***的性交*嗎？

0. ☐ 沒有性交

1. ☐ 幾乎沒有，或沒有

2. ☐ 間中有（遠少於一半時候）

3. ☐ 有時有（約一半時候）

4. ☐ 多數有（遠多於一半時候）

5. ☐ 幾乎必定有，或必定有

性交*：指陰莖插入（進入）伴侶的陰道 **總分：___________**

**總分在21分以下，你的病人可能已患有勃起功能障礙**
